# Supplementary material for: Reversible regulation of metallo-base-pair interactions for DNA dehybridization by ultrasound
Source: Royal Society of Chemistry journal article supplement (doi:10.1039/d1cc02402g), 2021-01-01
Supplement: d1cc02402g1.pdf [file d1cc02402g1.pdf]

**Electronic Supplementary Information**  
**for**  
**Reversible regulation of metallo-base-pair interactions for**  
**DNA dehybridization by ultrasound**

Shuaidong Huo,<sup>a,b,c,d</sup> Yu Zhou,<sup>b,d</sup> Zhihuan Liao,<sup>a</sup> Pengkun Zhao,<sup>b,d</sup> Miancheng Zou,<sup>b,d</sup>  
Robert Göstl<sup>b</sup> and Andreas Herrmann<sup>\*b,c,d</sup>

*<sup>a</sup>Fujian Provincial Key Laboratory of Innovative Drug Target Research, School of Pharmaceutical Science, Xiamen University, 361102 Xiamen, China.*

*<sup>b</sup>DWI – Leibniz Institute for Interactive Materials, Forckenbeckstr. 50, 52056 Aachen, Germany.*

*<sup>c</sup>Institute of Technical and Macromolecular Chemistry, RWTH Aachen University, Worringerweg 1, 52074 Aachen, Germany.*

*<sup>d</sup>Zernike Institute for Advanced Materials, University of Groningen, Nijenborgh 4, 9747 AG Groningen, The Netherlands.*

*\*Email: [herrmann@dwil.rwth-aachen.de](mailto:herrmann@dwil.rwth-aachen.de)*

## **1. Materials**

All chemical reagents were of analytical grade and were used without further purification if not stated otherwise. 3-morpholinopropanesulfonic acid (MOPs,  $\geq 99.5\%$ , Sigma-Aldrich),  $\text{AgNO}_3$  ( $\geq 99.0\%$ , Sigma-Aldrich),  $\text{NaNO}_3$  ( $\geq 99.0\%$ , Sigma-Aldrich), Agarose (Yuanye Biotech), GeneRuler Ultra Low Range DNA Ladder (Thermo-Fisher) and YeaRed Nucleic Acid Gel Stain (Yeasen Biotech) were used as received. Milli-Q water was used throughout the experiments.

All the  $\text{Ag}^+$ -base-paired DNA oligonucleotide (ODN) sequences (Table S1) were synthesized, HPLC-purified and MALDI-tested by Biomers Co. Ltd. (Germany). The C bases in the sequence are the binding site for  $\text{Ag}^+$ . For further quenching study, each

ODN was labeled with a fluorescent moiety (fluorescein, F) or a quencher (dabcyl, D) at the 3'- and 5'-ends, respectively.<sup>1</sup>

**Table S1.** Ag<sup>+</sup> base-paired ODNs used in this work.

| ODN name                                               | Sequences                                                                                           |
|--------------------------------------------------------|-----------------------------------------------------------------------------------------------------|
| 1.0T-ODN-F                                             | 5'CACACAACACAACACT(F)3'                                                                             |
| 2.0T-ODN-Q                                             | 3'CTCTCTTCTCTTCA(Q)5'                                                                               |
| 3.10T-ODN-F                                            | 5' <u>TTTTTTTTTT</u> CACACAACACAACACT(F)3'                                                          |
| 4.10T-ODN-Q                                            | 3'CTCTCTTCTCTTCA(Q) <u>TTTTTTTTTT</u> 5'                                                            |
| 5.30T-ODN-F                                            | 5' <u>TTTTTTTTTTTTTTTTTTTTTTTTTTTTTTTTTTTT</u> CACA<br>CAACACAACACT(F)3'                            |
| 6.30T-ODN-Q                                            | 3'CTCTCTTCTCTTCA(Q) <u>TTTTTTTTTTTTTTTT</u><br><u>TTTTTTTTTTTTTT</u> 5'                             |
| 7.50T-ODN-F                                            | 5' <u>TTTTTTTTTTTTTTTTTTTTTTTTTTTTTTTTTTTT</u><br><u>TTTTTTTTTTTTTTTTTTTT</u> CACACAACACAACACT(F)3' |
| 8.50T-ODN-Q                                            | 3'CTCTCTTCTCTTCA(Q) <u>TTTTTTTTTTTTTTTT</u><br><u>TTTTTTTTTTTTTTTTTTTTTTTTTTTTTTTTTTTT</u> 5'       |
| 9.50T-ODN-L                                            | 5' <u>TTTTTTTTTTTTTTTTTTTTTTTTTTTTTTTTTTTT</u><br><u>TTTTTTTTTTTTTTTTTTTT</u> CACACAACACAACACT3'    |
| 10.50T-ODN-R                                           | 3'CTCTCTTCTCTTCA <u>TTTTTTTTTTTTTTTTTTTT</u><br><u>TTTTTTTTTTTTTTTTTTTTTTTTTTTTTTTTTTTT</u> 5'      |
| ODN: oligodeoxyribonucleotide F: fluorescein Q: dabcyl |                                                                                                     |

## 2. Methods

### Fluorescence assays

Fluorescence spectra of fluorescein DNA structures were measured with a spectrophotometer (SpectraMax M3, Molecular Devices). Briefly, Ag<sup>+</sup> of different concentrations was incubated with Ag<sup>+</sup> base-paired ODNs (fluorescein- and quencher-labelled, 1:1 in molar ratio,  $c = 10$  nM) in MOPs buffer (pH = 7.0) containing 50 mM of NaNO<sub>3</sub> for 5 min at 25 °C. Then, the fluorescence measurement of each mixture was carried out under an excitation wavelength  $\lambda = 490$  nm at 25 °C.

For studying the mechanochemical response of the DNA sequences, the fluorescence emission intensity was measured at  $\lambda = 520$  nm immediately after ultrasonication, under an excitation wavelength  $\lambda = 490$  nm at 25 °C. For the temperature-dependent experiments, the fluorescence intensity of each mixture was measured every 30 s during the temperature increase (25 °C to 60 °C) and decrease (60 °C to 25 °C).

### Calculation of normalized fluorescence intensity

Normalized fluorescence intensities of each test were determined by dividing the fluorescence intensity of the sample by the fluorescence intensity of the free fluorophore-labeled oligodeoxyribonucleotide without any treatment, multiplying the result by 100.

### Sonication experiments

Ultrasonication experiments on Ag<sup>+</sup> base-paired ODNs ( $c = 10$  nM) were performed in a 1 mL ultrasonication vessel (Test tube heavy-walled, 2775/2, Assistant) with a Qsonica Q125 sonicator (USA) equipped with a 3 mm diameter microtip probe (A12628PRB20). Sonication was performed using pulsed ultrasound (1.0 s on, 1.0 s off at 50% Amplitude) at  $f = 20$  kHz. The vessel was placed in an ice bath to maintain a temperature inside the vessel of 6-9 °C throughout sonication.

### Agarose gel electrophoresis

4% agarose gel was prepared and stained with YeaRed Nucleic Acid Gel Stain, then used to determine the hybridization and US-responsive dehybridization of Ag<sup>+</sup>-base-paired ODNs with 50T tail. As indicated in Figure S1, each sample was mixed with 5  $\mu$ L loading dye, and then loaded into each well, respectively. Ultra-low range DNA ladder was loaded in lane 1 as gel marker. Electrophoresis was carried out at a voltage of 120 V for 40 min in TAE (1 $\times$ ) running buffer. Finally, the results were pictured and analyzed.

### 3. Supplementary figures

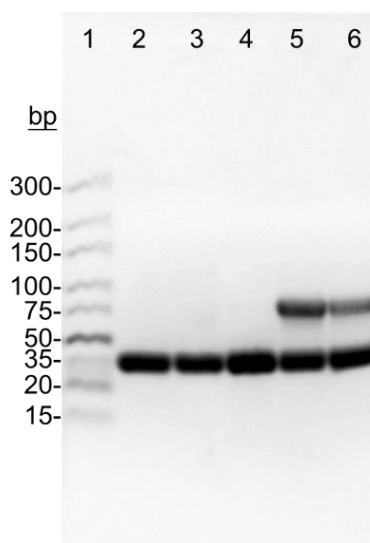

**Figure S1.** Agarose gel (4%) electrophoresis of  $\text{Ag}^+$ -base-paired ODNs with 50T tail. Lane 1: ultra-low range DNA marker; lane 2: 50T-ODN-L; lane 3: 50T-ODN-R; lane 4: 50T-ODN-L + 50T-ODN-R; lane 5: 50T-ODN-L + 50T-ODN-R +  $\text{Ag}^+$ ; lane 6: 50T-ODN-L + 50T-ODN-R +  $\text{Ag}^+$  with US treatment. The lateral annotation of ultra-low range DNA marker indicates the number of base pairs.

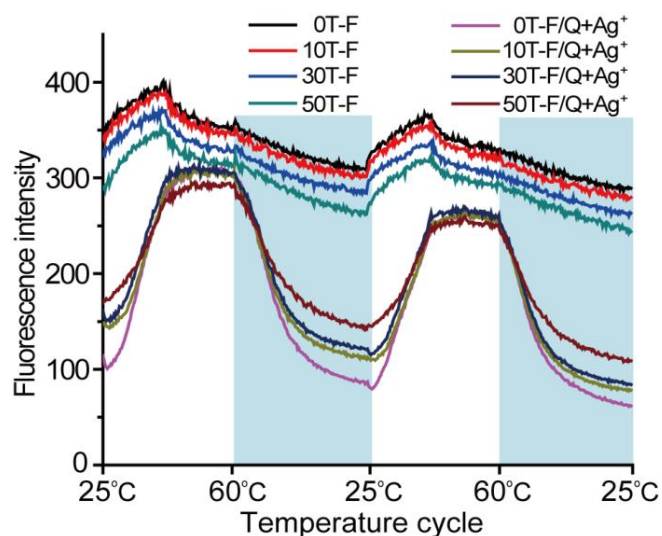

**Figure S2.** Real time temperature-dependent fluorescence intensity recording of fluorescein-labelled ODNs and  $\text{Ag}^+$  base-paired ODNs with varying length of DNA tails. The temperature ramp rate was  $0.5\text{ }^\circ\text{C}\cdot\text{min}^{-1}$ .

### 4. References

- 1 Y. Tanaka, J. Kondo, V. Sychrovský, J. Šebera, T. Dairaku, H. Saneyoshi, H. Urata, H. Torigoe and A. Ono, *Chem. Commun.*, 2015, **51**, 17343–17360.
